# Supplementary material
Source: MDPI journal article supplement (https://www.mdpi.com/2073-4344/11/8/916)
Supplement: s1 [file s1 › catalysts-1313889-supplementary.pdf]

# Supporting Information

## Synergistic Effects of Bimetallic AuPd and La<sub>2</sub>O<sub>3</sub> in the Catalytic Reduction of NO with CO

*Xianwei Wang<sup>#[a]</sup>, Nobutaka Maeda<sup>\*[b]</sup>, Daniel M. Meier<sup>[b]</sup>*

[a] Key Laboratory of Industrial Ecology and Environmental Engineering, School of Environmental Science and Technology, Dalian University of Technology, Dalian 116024 (P. R. China)

[b] Institute of Materials and Process Engineering (IMPE), School of Engineering (SoE), Zurich University of Applied Sciences (ZHAW), Winterthur CH-8400, Switzerland

Email: [maeo@zhaw.ch](mailto:maeo@zhaw.ch)

# Present address: Department of Physical Chemistry, University of Geneva, Geneva CH-1204 (Switzerland)

## 1. X-ray photoelectron spectroscopy (XPS)

Table S1 summarises results of XPS analysis of catalysts pre-treated in hydrogen at 300 °C for 1h. The addition of La<sub>2</sub>O<sub>3</sub> had no influence of the ratio of Au to Pd on the near-surface region detectable by XPS.

**Table S1.** XPS results of AuPd, AuPd-La, La supported on TiO<sub>2</sub>. Catalyst designations are given in the Experimental Section of the main manuscript.

| Catalyst                        | XPS                                           |                                               |         |              |
|---------------------------------|-----------------------------------------------|-----------------------------------------------|---------|--------------|
|                                 | Binding energy<br>of Au4f <sub>7/2</sub> (eV) | Binding energy<br>of Pd3d <sub>5/2</sub> (eV) | Au      | La           |
|                                 |                                               |                                               | Au + Pd | Au + Pd + La |
| AuPd/TiO <sub>2</sub>           | 82.8                                          | 334.1 – 334.6                                 | 0.43    | 0            |
| AuPd-La(1:0.5)/TiO <sub>2</sub> | 82.7                                          | 334.1 – 334.6                                 | 0.43    | 0.48         |
| AuPd-La(1:1)/TiO <sub>2</sub>   | 82.6                                          | 334.1 – 334.6                                 | 0.42    | 0.65         |
| AuPd-La(1:2)/TiO <sub>2</sub>   | 82.6                                          | 334.1 – 334.6                                 | 0.44    | 0.67         |
| La/TiO <sub>2</sub>             | –                                             | –                                             | –       | –            |

## 2. X-ray diffraction (XRD)

Figure S1 shows XRD patterns of catalysts pre-treated in hydrogen for 1h. All the patterns are assigned to rutile and anatase phases of TiO<sub>2</sub>. Patterns of bimetallic AuPd nanoparticles were not detected because the particle size was small (2.1-2.2 nm). Crystalline phase of La<sub>2</sub>O<sub>3</sub> was not detected either, indicating that La<sub>2</sub>O<sub>3</sub> is finely dispersed on the catalyst surface either as amorphous particles or mono-/multi-layers.

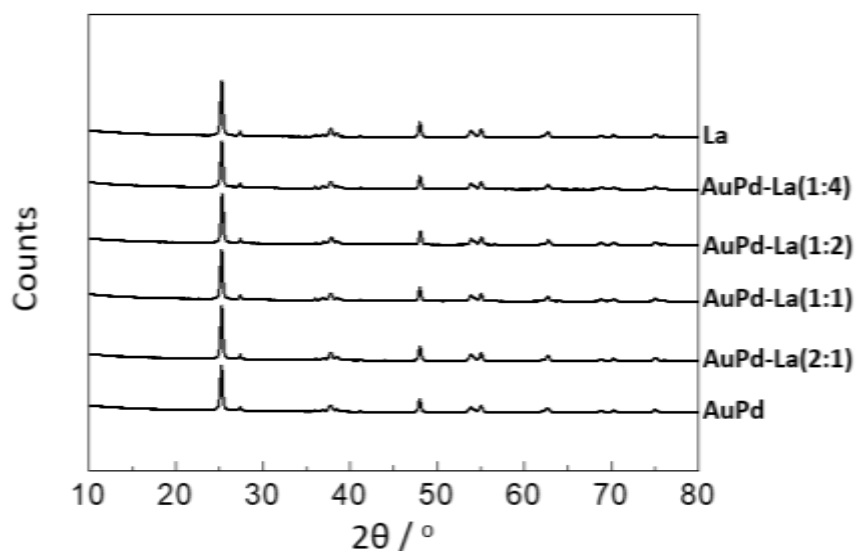

**Figure S1.** XRD patterns of catalysts.

### 3. In situ IR spectra during adsorption-desorption of NO

Figure S2 displays phase-domain IR spectra during NO adsorption-desorption cycles at 50 °C (2000 ppm NO in He balance, 150 mL/min). Because of the background change caused by reflectivity and absorptivity change of TiO<sub>2</sub> surface, some bands were difficult to be assigned. The IR band at ca. 1750 cm<sup>-1</sup> is assigned to on-top NO on Pd surface. As clearly seen, there was no obvious difference in IR spectra by the addition of La<sub>2</sub>O<sub>3</sub>.

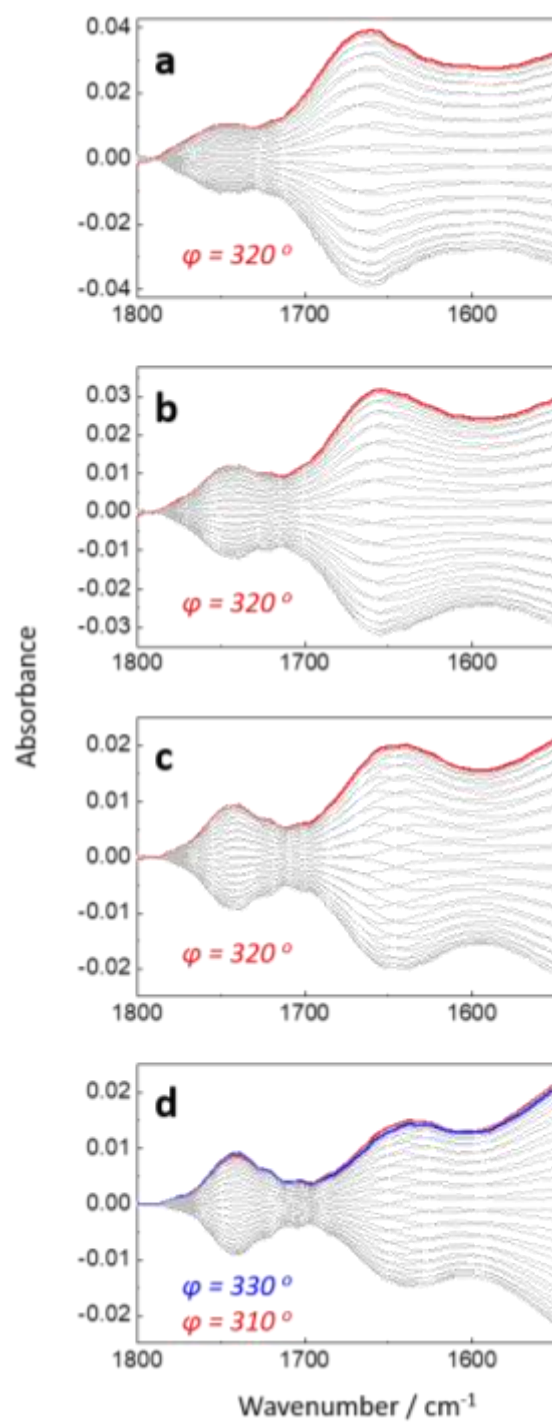

**Figure S2.** Phase-domain IR spectra during NO adsorption-desorption cycles at 50 °C.
